# Supplementary material for: MITF Is Regulated by Redox Signals Controlled by the Selenoprotein Thioredoxin Reductase 1
Source: MDPI journal article supplement (doi:10.3390/cancers14205011), 2022-10-13
Supplement: s1 [file s1]

# **SUPPLEMENTAL FIGURES**

Supplementary Figure S1.

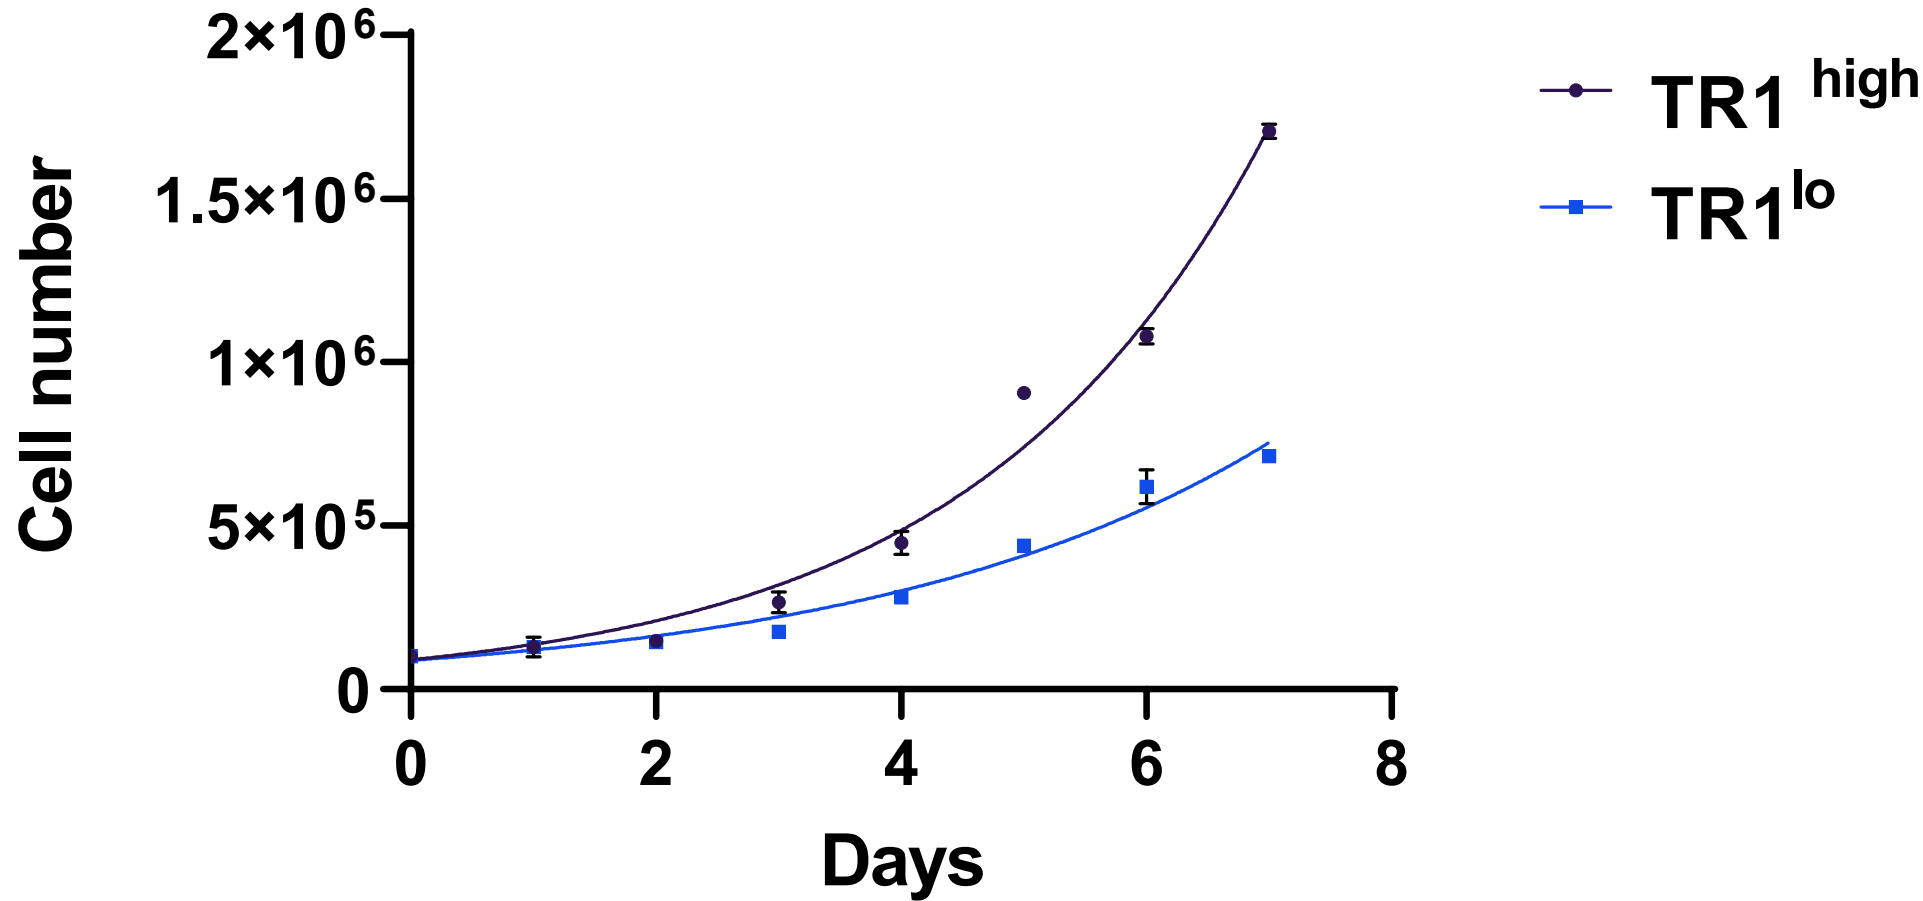

|                      | TR1 <sup>high</sup> | 95%CI     | TR1 <sup>low</sup> | 95%CI     |
|----------------------|---------------------|-----------|--------------------|-----------|
| Doubling Time (days) | 1.65                | 1.48-1.83 | 2.26               | 2.01-2.57 |

95%CI= 95% confidence interval

**Supplementary Figure S2. Knockdown of TR1 using siRNAs directed against TR1 with three different transfection reagents results in decreases in TYRP1 and TYR proteins.** M14 melanoma cells were treated with siRNAs targeting human *TXNRD1* (Dharmacon siRNA SMARTpool cat # L-008236-00-0010) or non-targeting control siRNAs (cat# D-001810-01-05) using three different transfection reagents. After 48 hours cells were harvested and lysates were analyzed by Western blot.

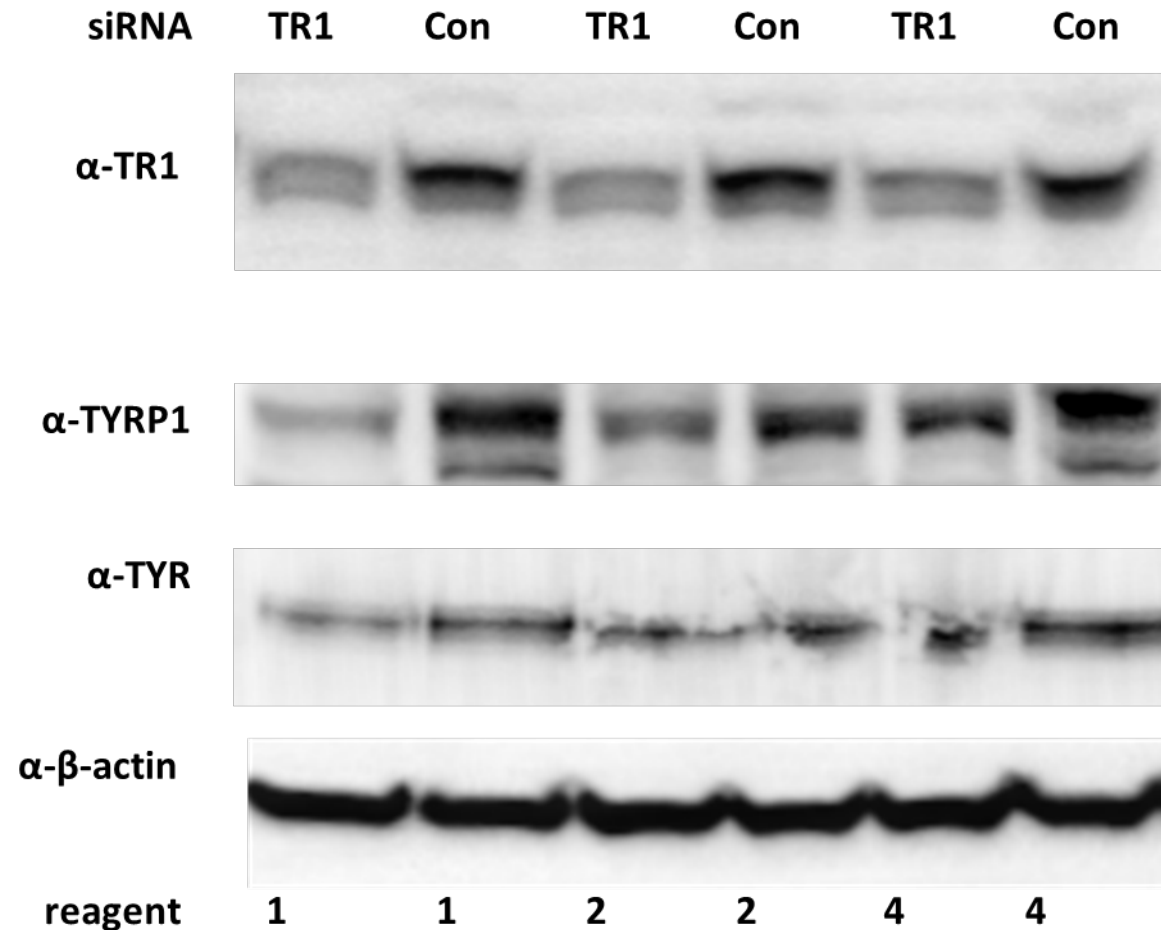

Supplementary Figure S3.

|       | TR1 expression log2<br>Fold Change | p value* |
|-------|------------------------------------|----------|
| TYR   | -8.71                              | 5.59E-09 |
| TYRP1 | -3.60                              | 2.88E-06 |
| PMEL  | -4.09                              | 6.61E-06 |
| MLANA | -4.35                              | 1.70E-07 |
| DCT   | -7.48                              | 2.33E-06 |

RNAseq data for M14<sup>TXNRD1+/-</sup> B

\*(adjusted for multiple comparisons)

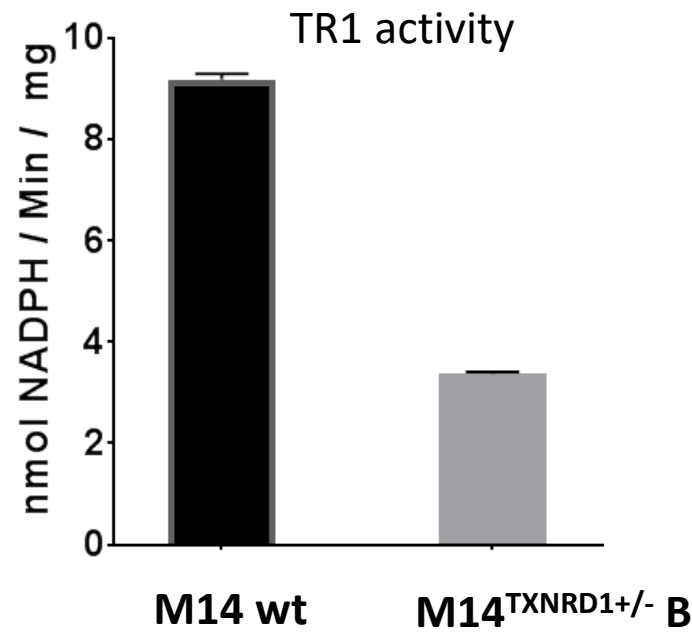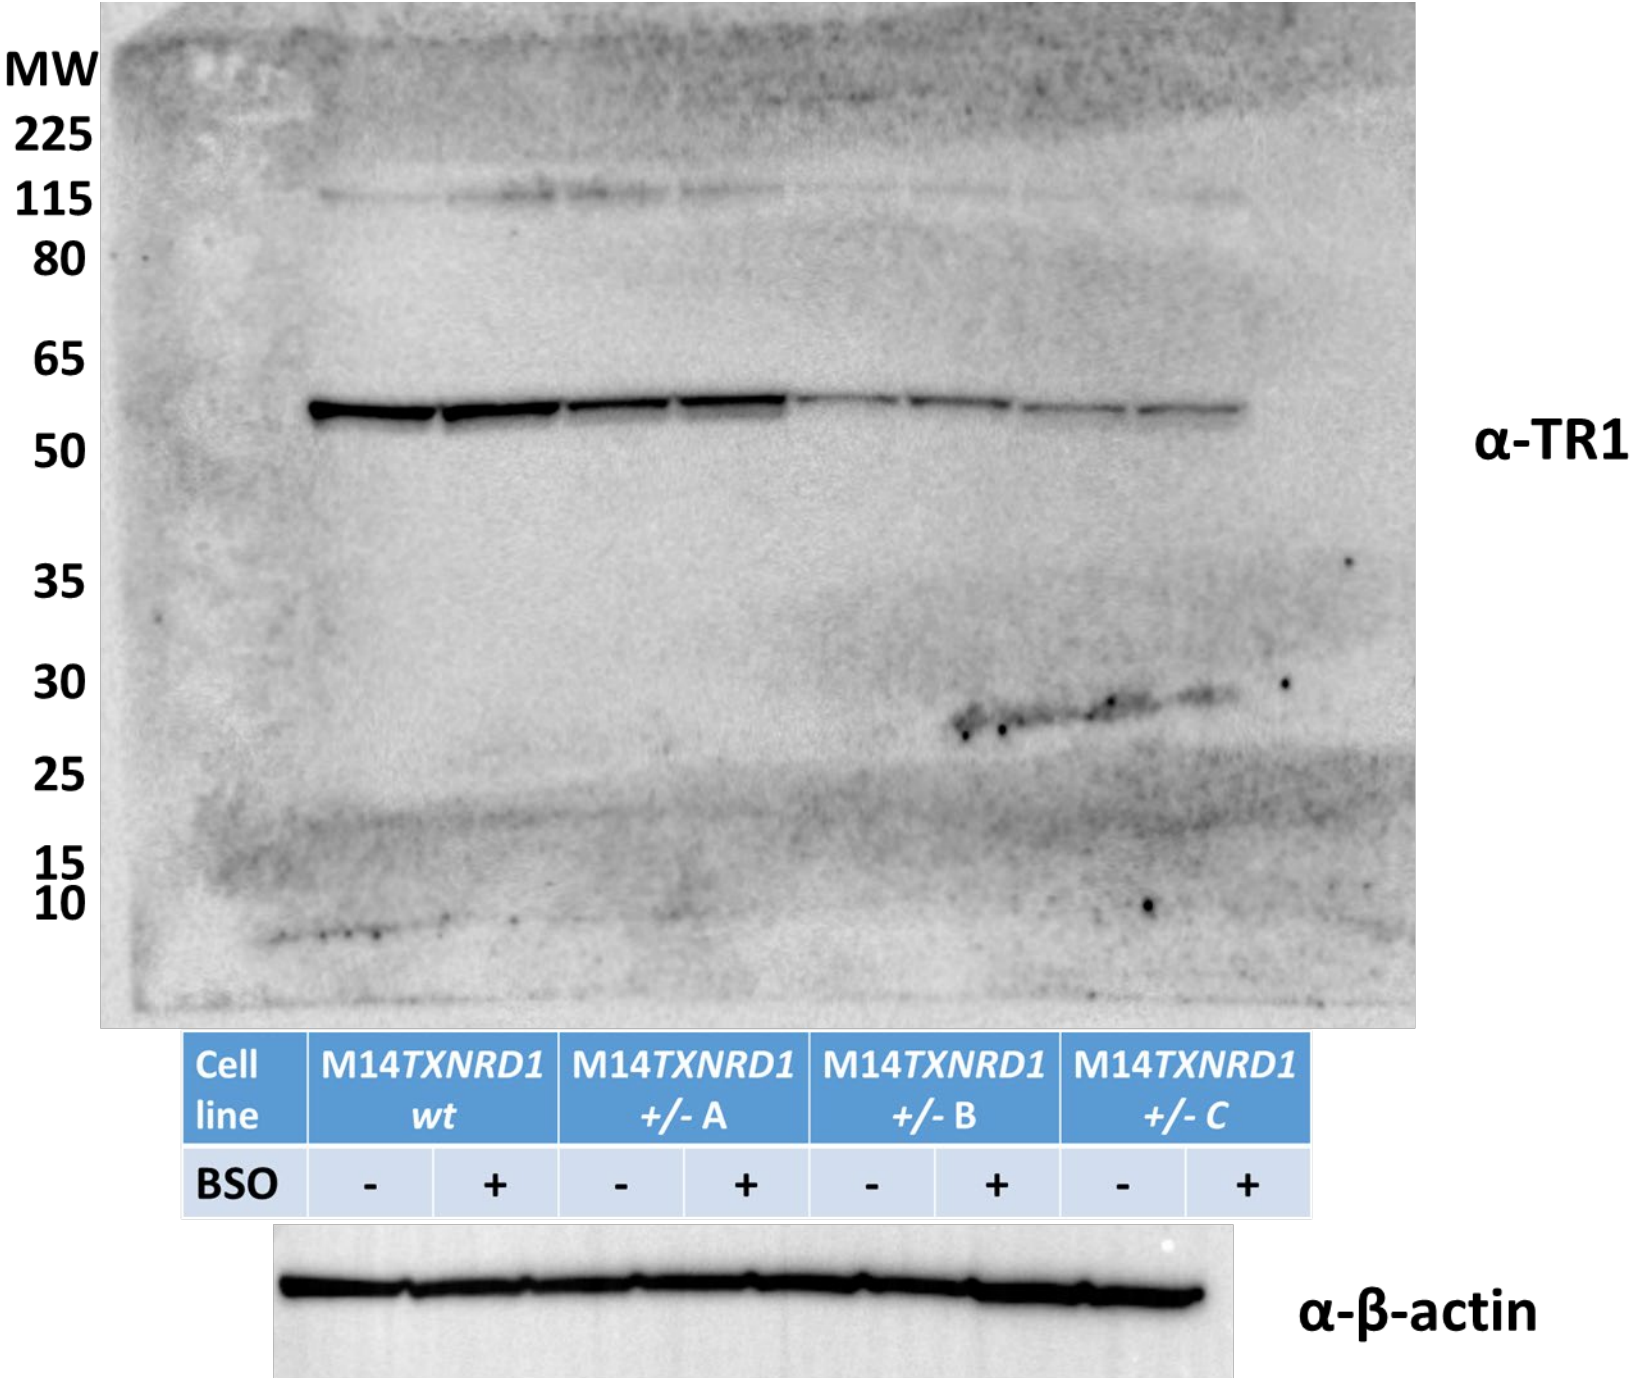

Supplementary Figure S4.

Mutations in M14<sup>TXNRD1+/-</sup> B cell line

|                       |                                                                                                                                                                                                                                                              |
|-----------------------|--------------------------------------------------------------------------------------------------------------------------------------------------------------------------------------------------------------------------------------------------------------|
|                       | Sequence (Exon 9), <b>BOLD</b> = Cas9 Target, <b>TGG</b> = PAM site, <b>Mutant sequence</b> , *= stop codon                                                                                                                                                  |
| Exon 9 wt sequence    | GATGATCTTTTCTCCTTGCCTTACTGCCCCGGGTAAGACCCTGGTTGTT <b>GGAGCATCCTATGTCGCTT<b>TGG</b>AGT</b><br>GCGCTGGATTTCTTGCTGGTATTGGTTTAGACGTCCTGTTATGGTTAGGTCCATTCTTCTTAGAGGATTTGAC<br>CAGGACATGGCCAACAAAATTGGTGAACACATGGAAGAACATGGCATCAAGTTTATAAGACAGTTCGTACCA<br>ATTAAA |
| Amino acid sequence   | DDLFSLPYCPGKTLVV <b>GASYVALE</b> CAGFLAGIGLDVTVMVRSILLRGFDQDMANKIGEHEEHGFIKFIQFVPIK                                                                                                                                                                          |
| <b>CT DEL, NT:</b>    | GATGATCTTTTCTCCTTGCCTTACTGCCCCGGGTAAGACCCTGGTTGTTGGAGCATCCTATGTCG__ <b>T<b>TGG</b>AGTG</b><br>CGCTGGATTTCTTGCTGGTATTGGTTTAGACGTCCTGTTATGGTTAGGTCCATTCTTCTTAGAGGATTTGACC<br>AGGACATGGCCAACAAAATTGGTGAACACATGGAAGAACATGGCATCAAGTTTATAAGACAGTTCGTACCAA<br>TTAAA |
| <b>AA :</b>           | DDLFSLPYCPGKTLVV <b>GASYV</b> <b>VGVRWISCWYWFRRH</b> <b>CYG*VHSS*RI*PGHGQQNW*THGRTWQVYKTVRTN</b>                                                                                                                                                             |
| <b>TCGCT DEL, NT:</b> | GATGATCTTTTCTCCTTGCCTTACTGCCCCGGGTAAGACCCTGGTTGTTGGAGCATCCTATG____ <b>T<b>TGG</b>AGTG</b><br>CGCTGGATTTCTTGCTGGTATTGGTTTAGACGTCCTGTTATGGTTAGGTCCATTCTTCTTAGAGGATTTGACC<br>AGGACATGGCCAACAAAATTGGTGAACACATGGAAGAACATGGCATCAAGTTTATAAGACAGTTCGTACCAA<br>TTAAA  |
| <b>AA :</b>           | DDLFSLPYCPGKTLVV <b>GASYV</b> <b>GVRWISCWYWFRRH</b> <b>CYG*VHSS*RI*PGHGQQNW*THGRTWHQVYKTVRTN*</b>                                                                                                                                                            |

Supplementary Figure S5

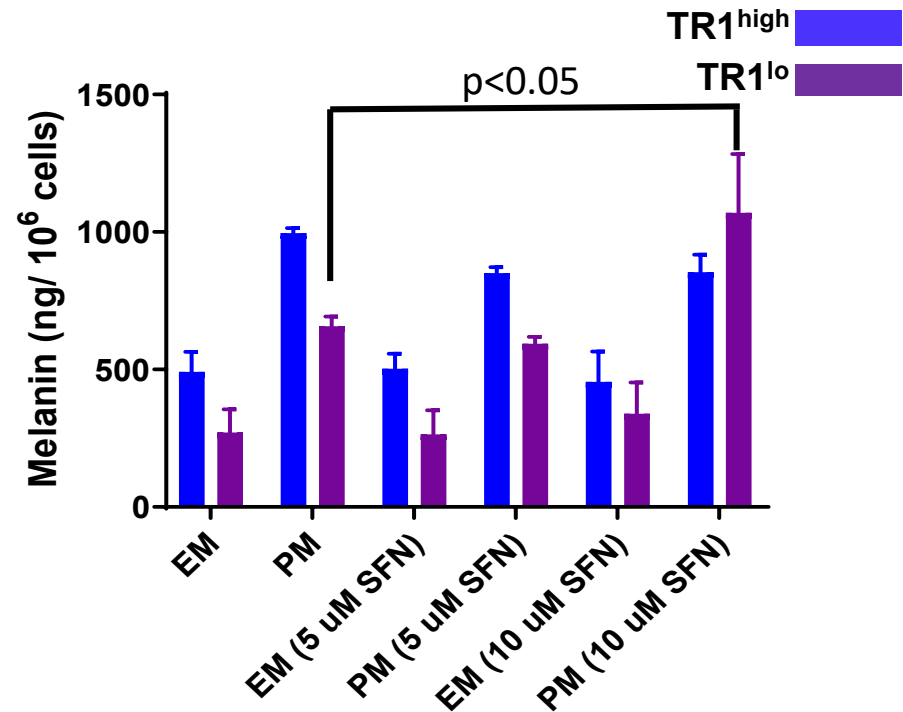

Supplementary Figure S6. qPCR analysis of TR1<sup>lo</sup> cells relative to TR1<sup>high</sup> .

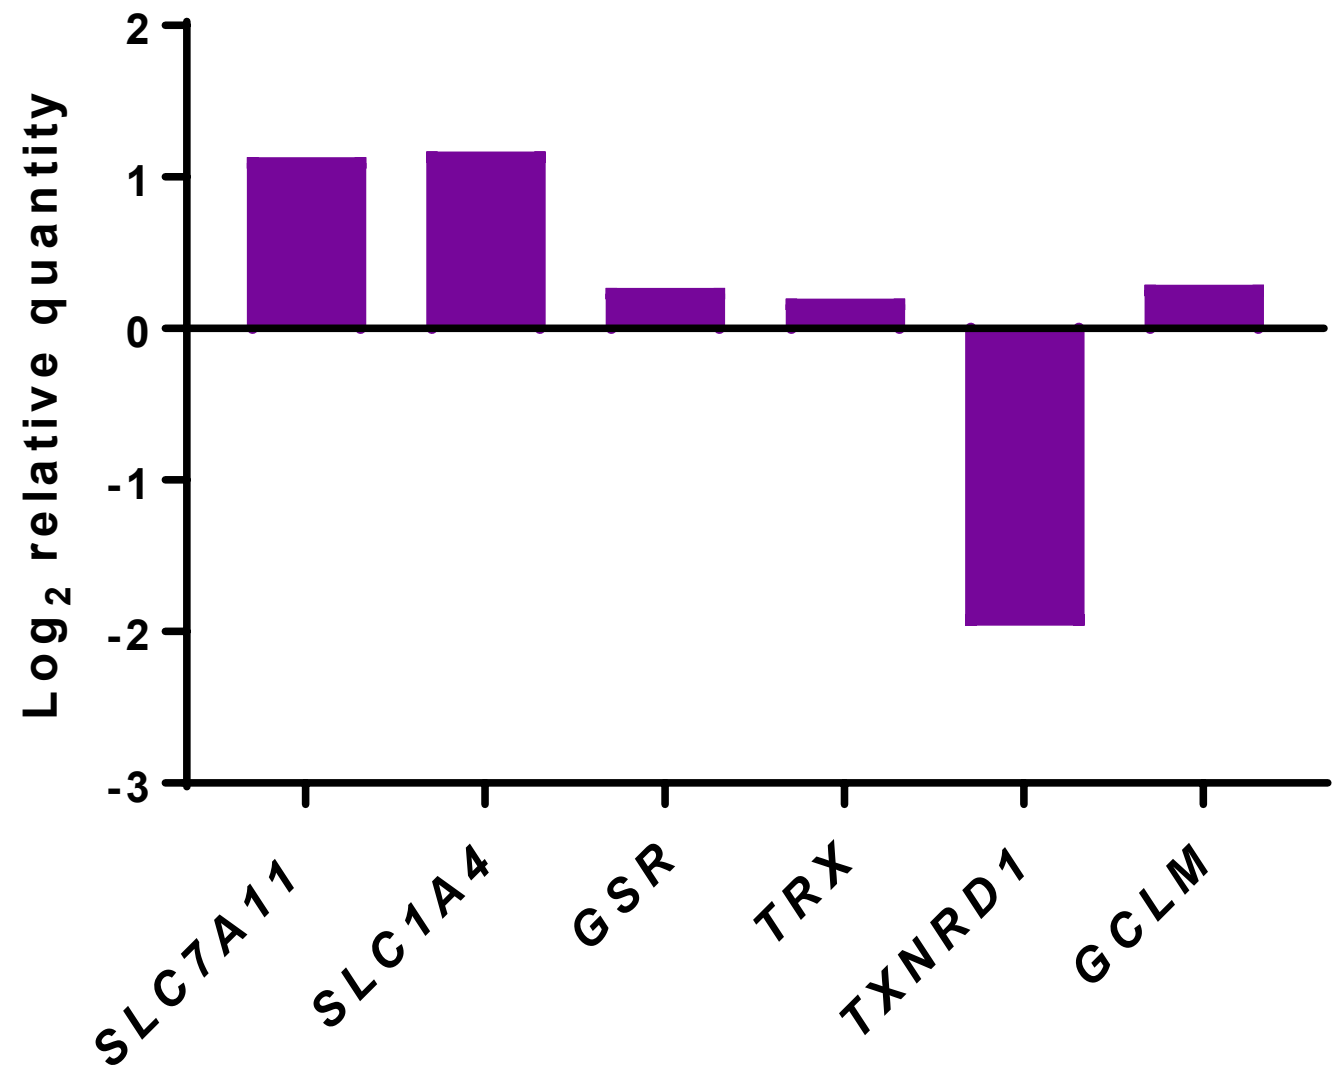

## Supplementary Figure S7.

**a**

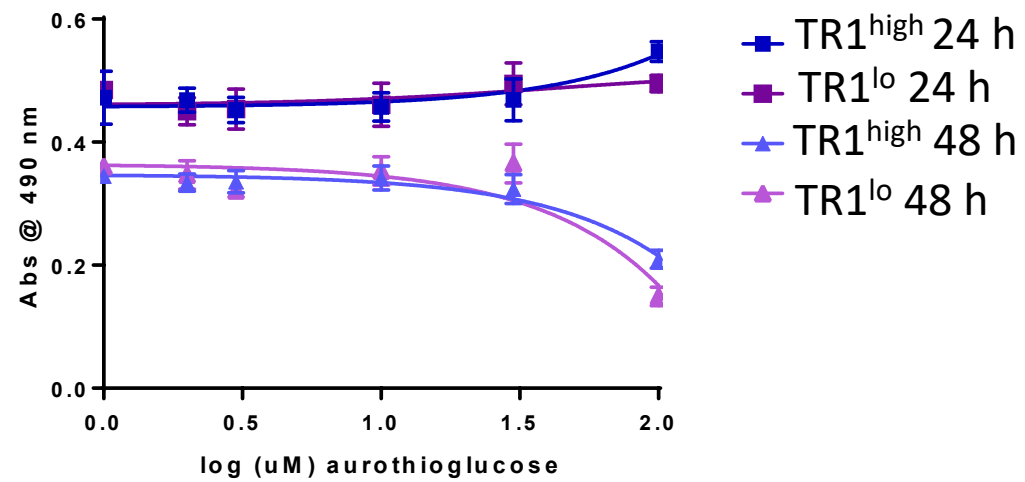

**b**

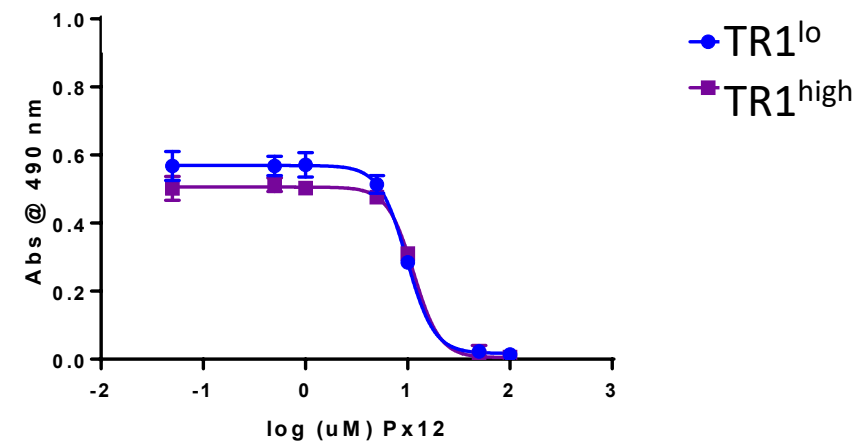



Supplementary Figure S8.

Figure 3B  
serum Lot A

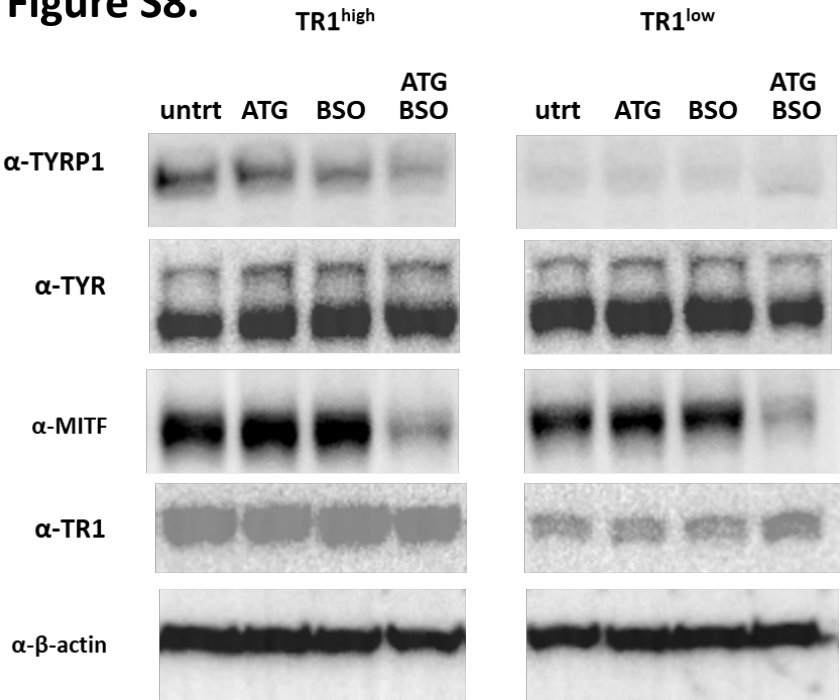

Previous experiment  
Serum Lot B

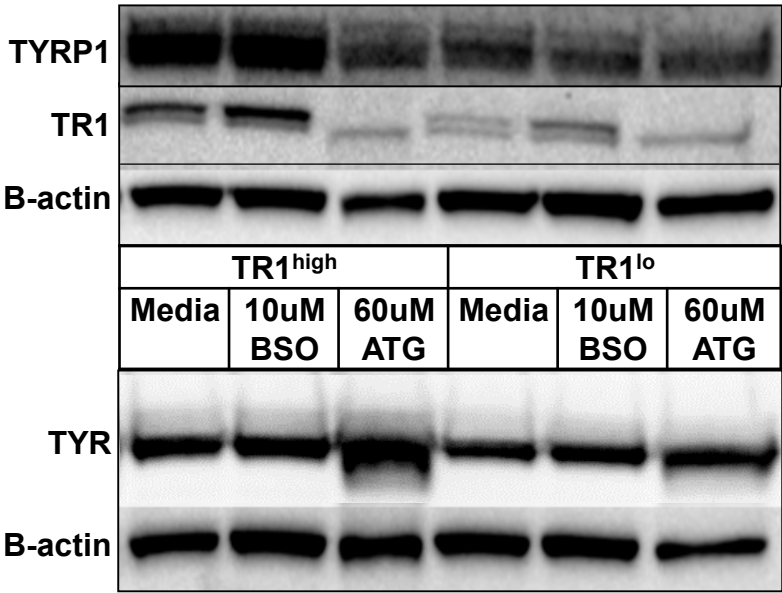

Figure 3C  
serum Lot A

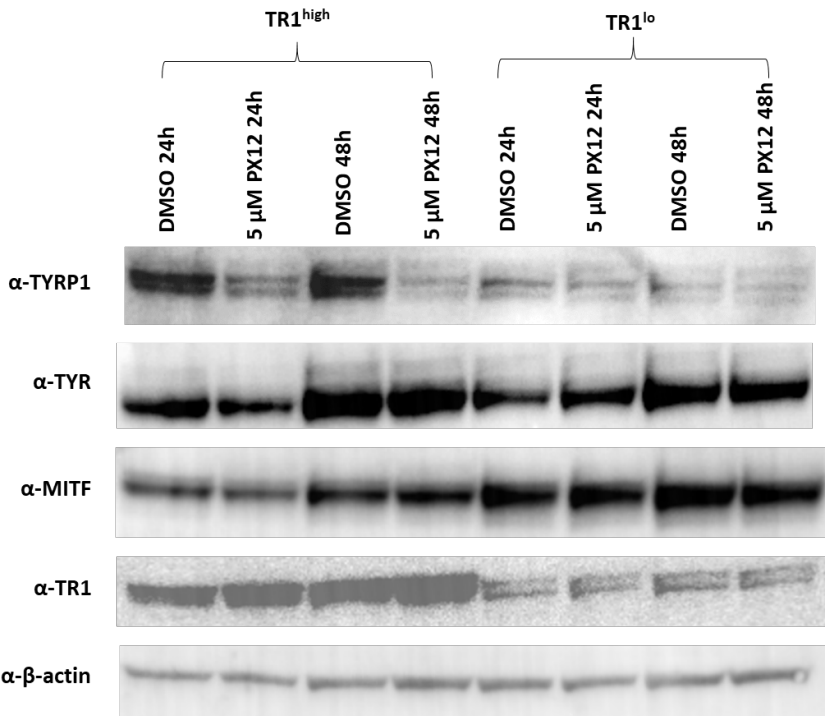

Previous experiment  
Serum Lot B

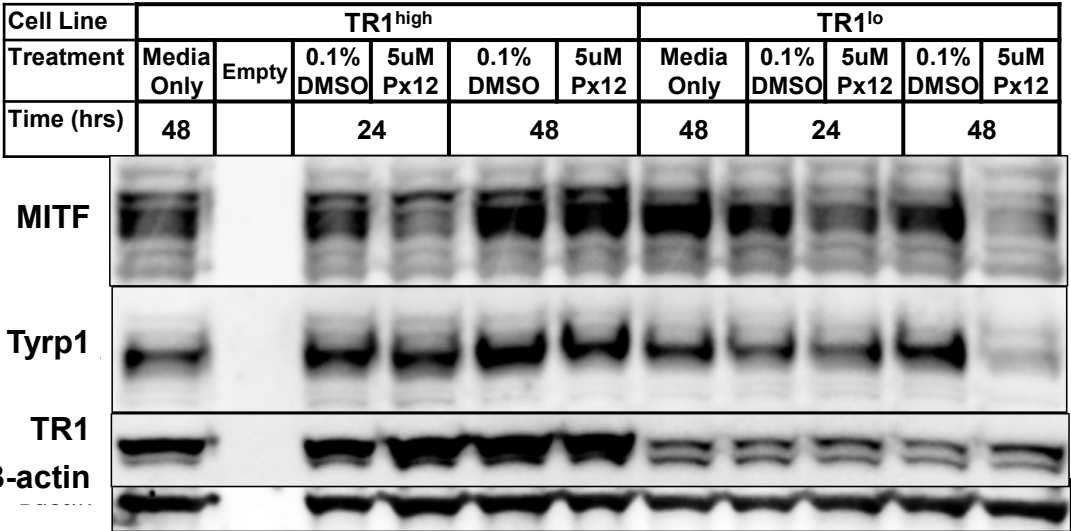

Supplementary Figure S9.

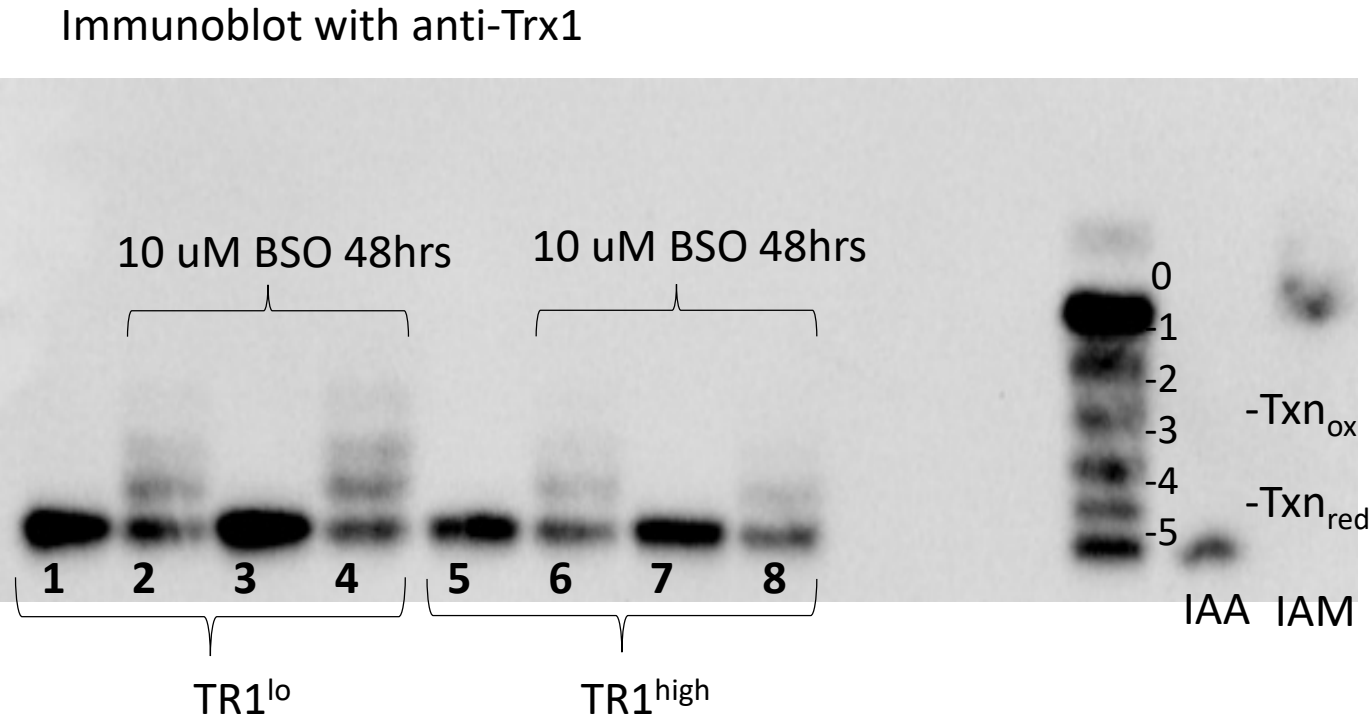

- Lanes:**
- 1) IAA
  - 2) IAM
  - 3) BSO + IAA
  - 4) BSO + IAM
  - 5) IAA
  - 6) IAM
  - 7) BSO + IAA
  - 8) BSO + IAM

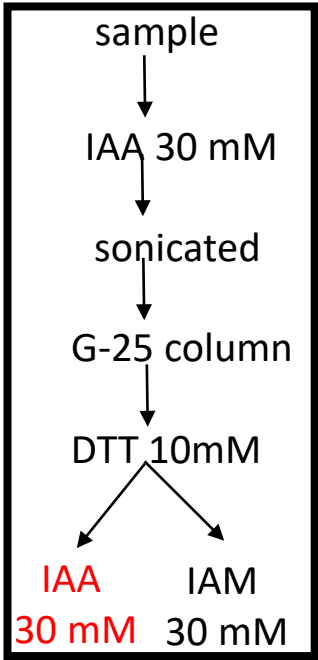

Method:

Fernando M.R., Nanri H., Yoshitake, S., Ngata-Kuno, K., Minakami, S. Eur. J. Biochem. **1992**, 209, 917-922.

Supplemental Figure S10

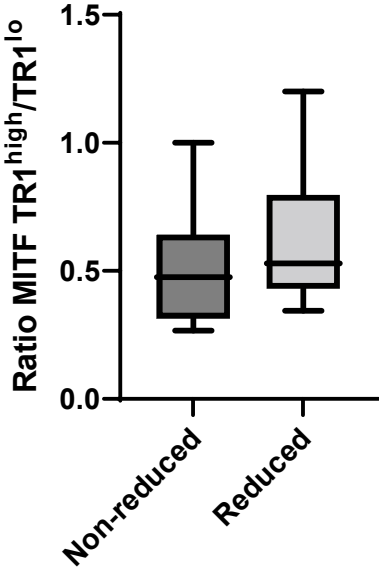

Supplemental Figure S11

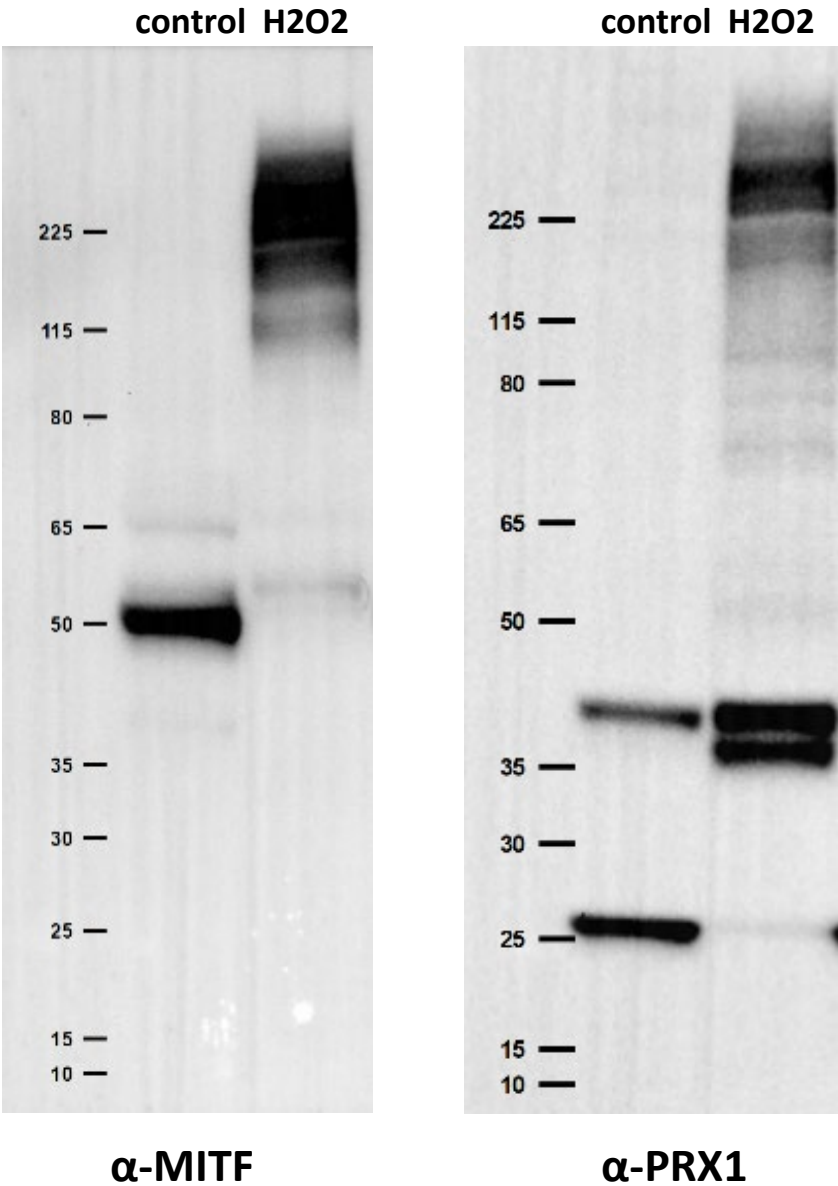

Supplemental Figure S12

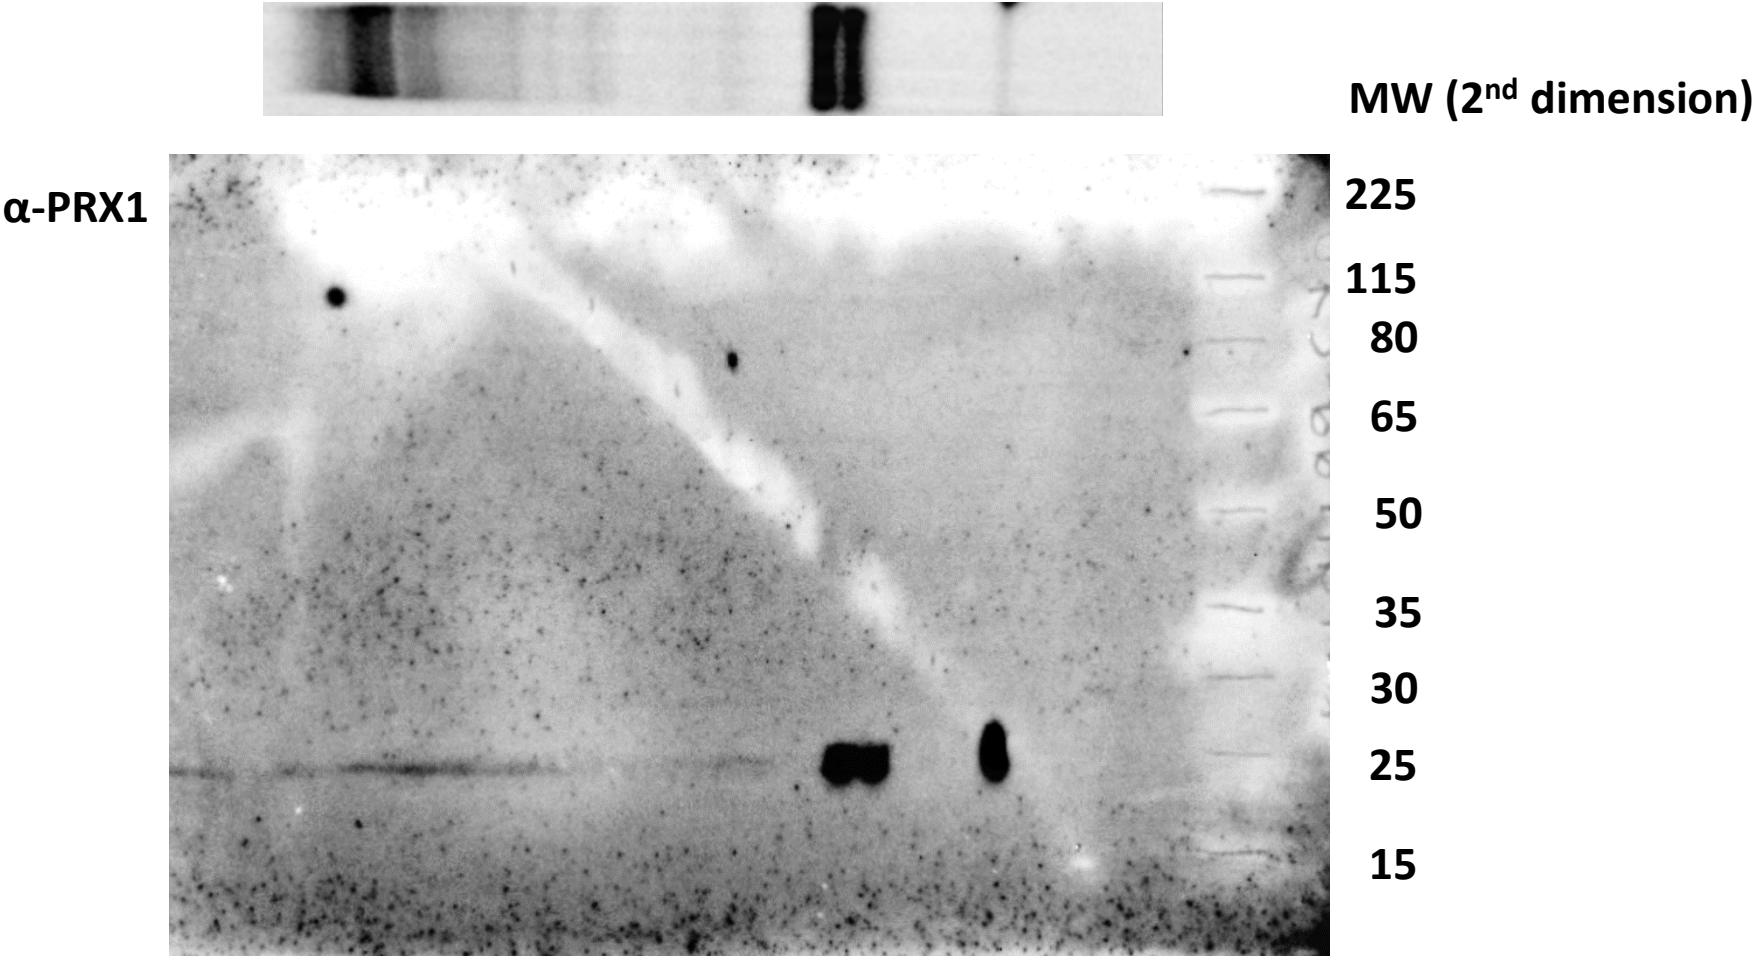

Supplementary Figure S13. **Non-reducing**

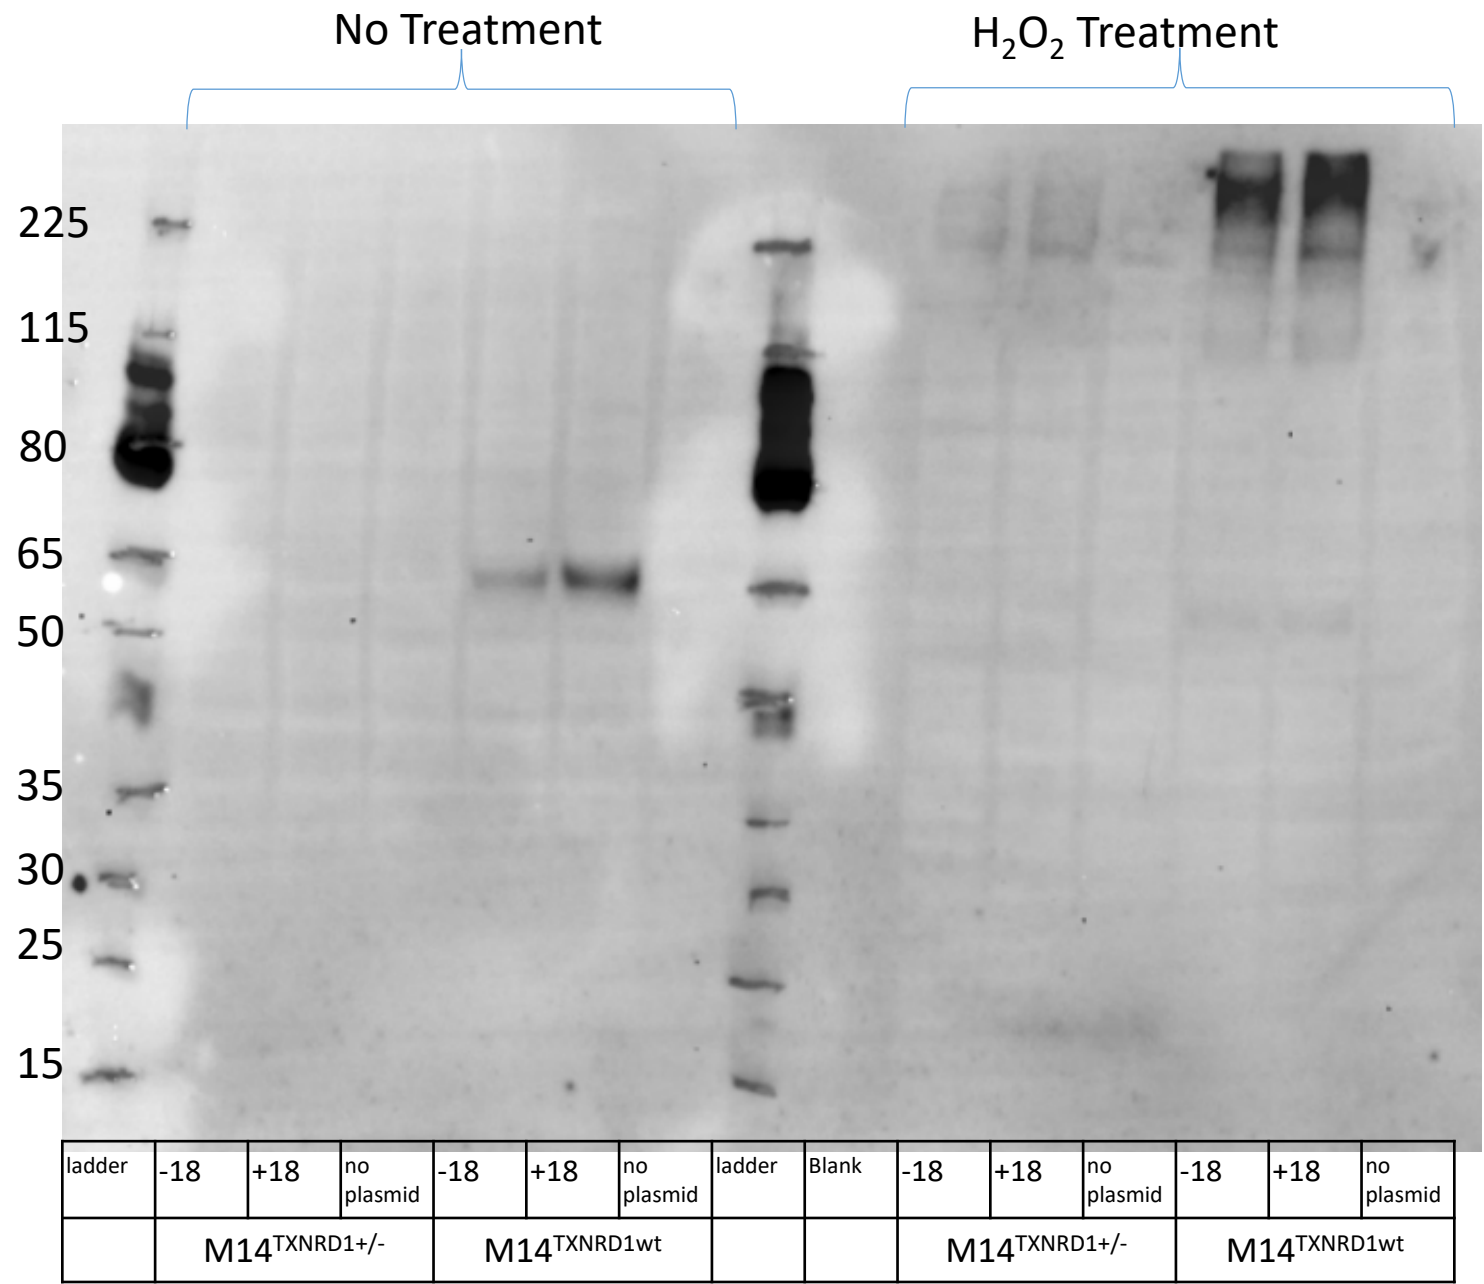

anti- Flag (sigma)

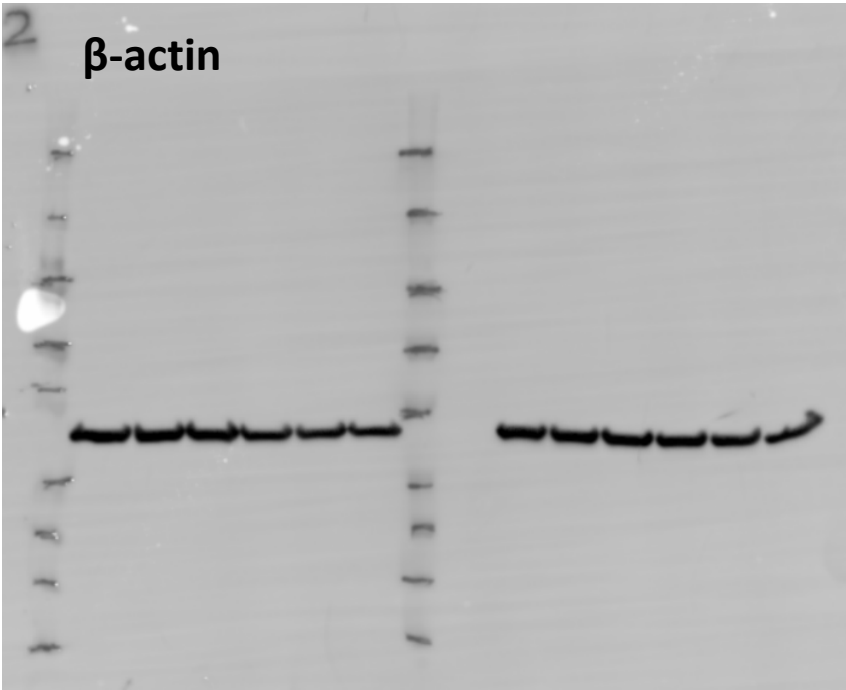

Supplementary Figure S14- Reducing

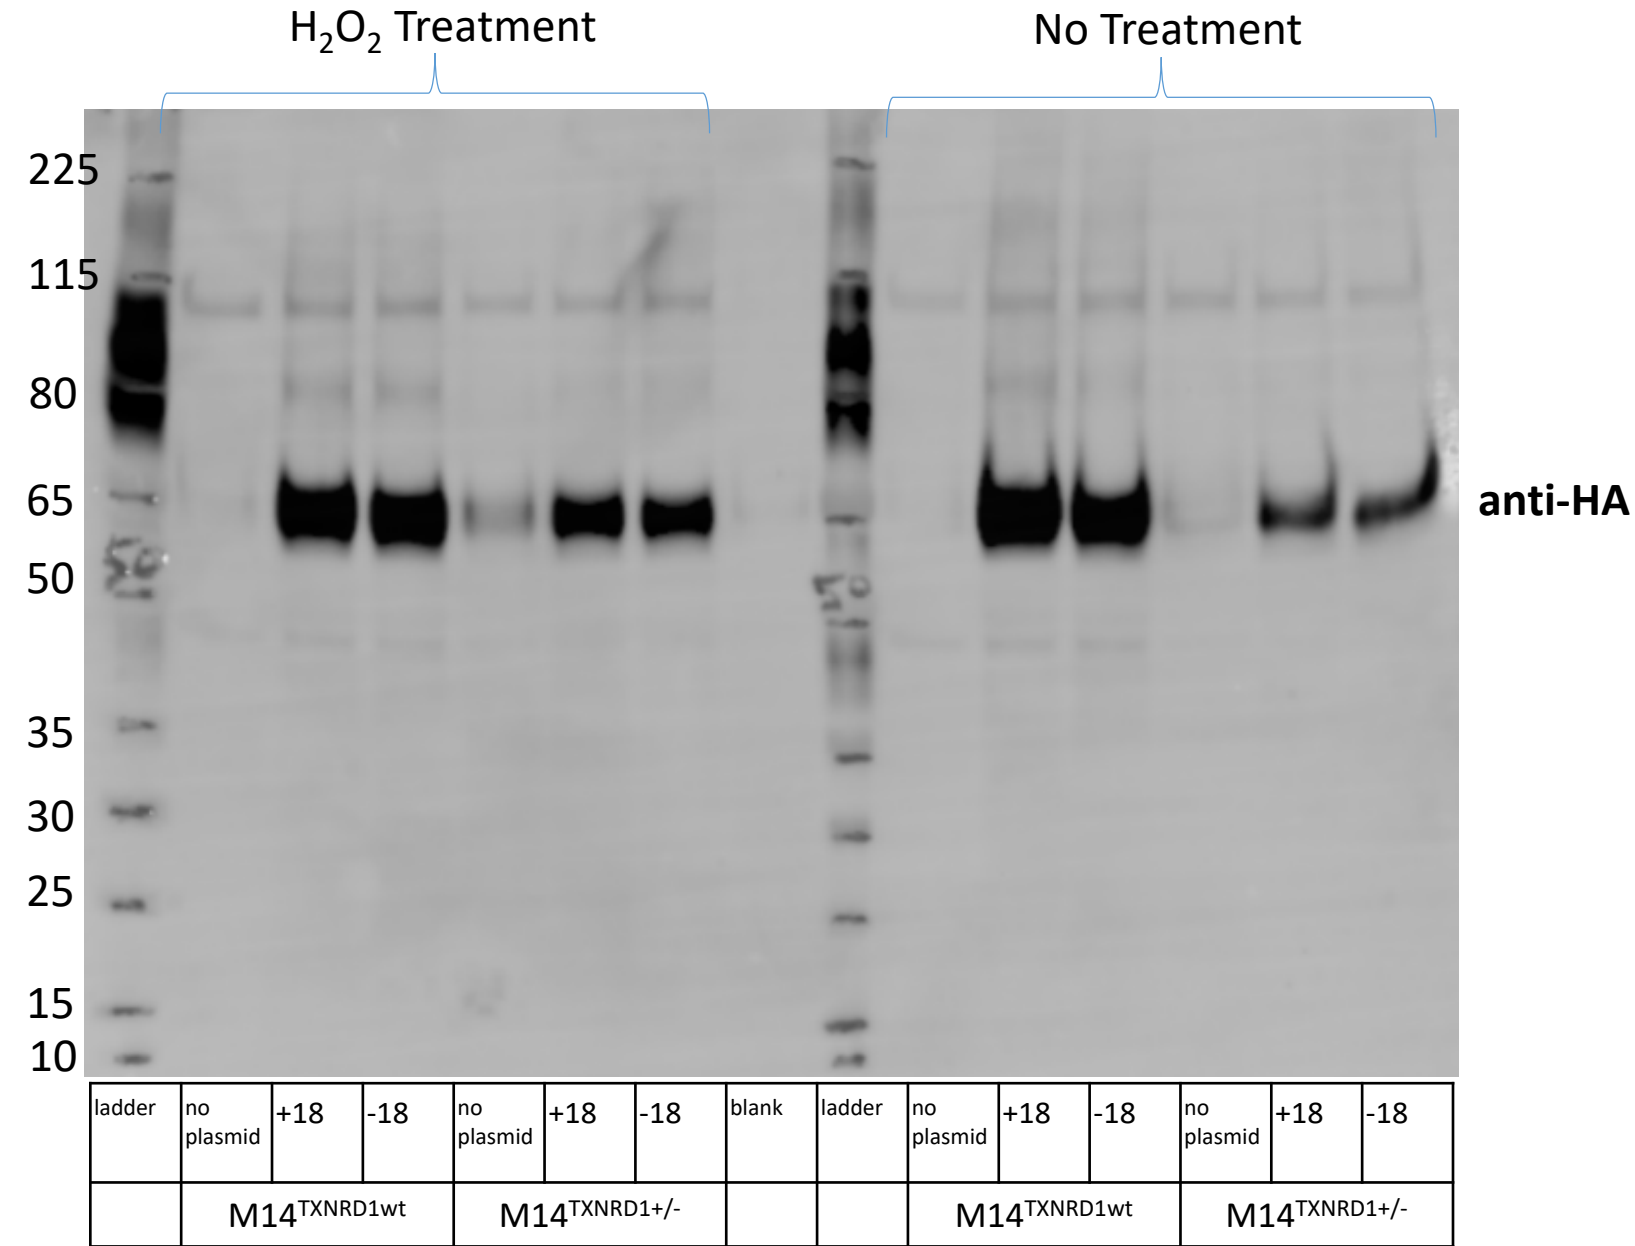

Supplementary Figure S15

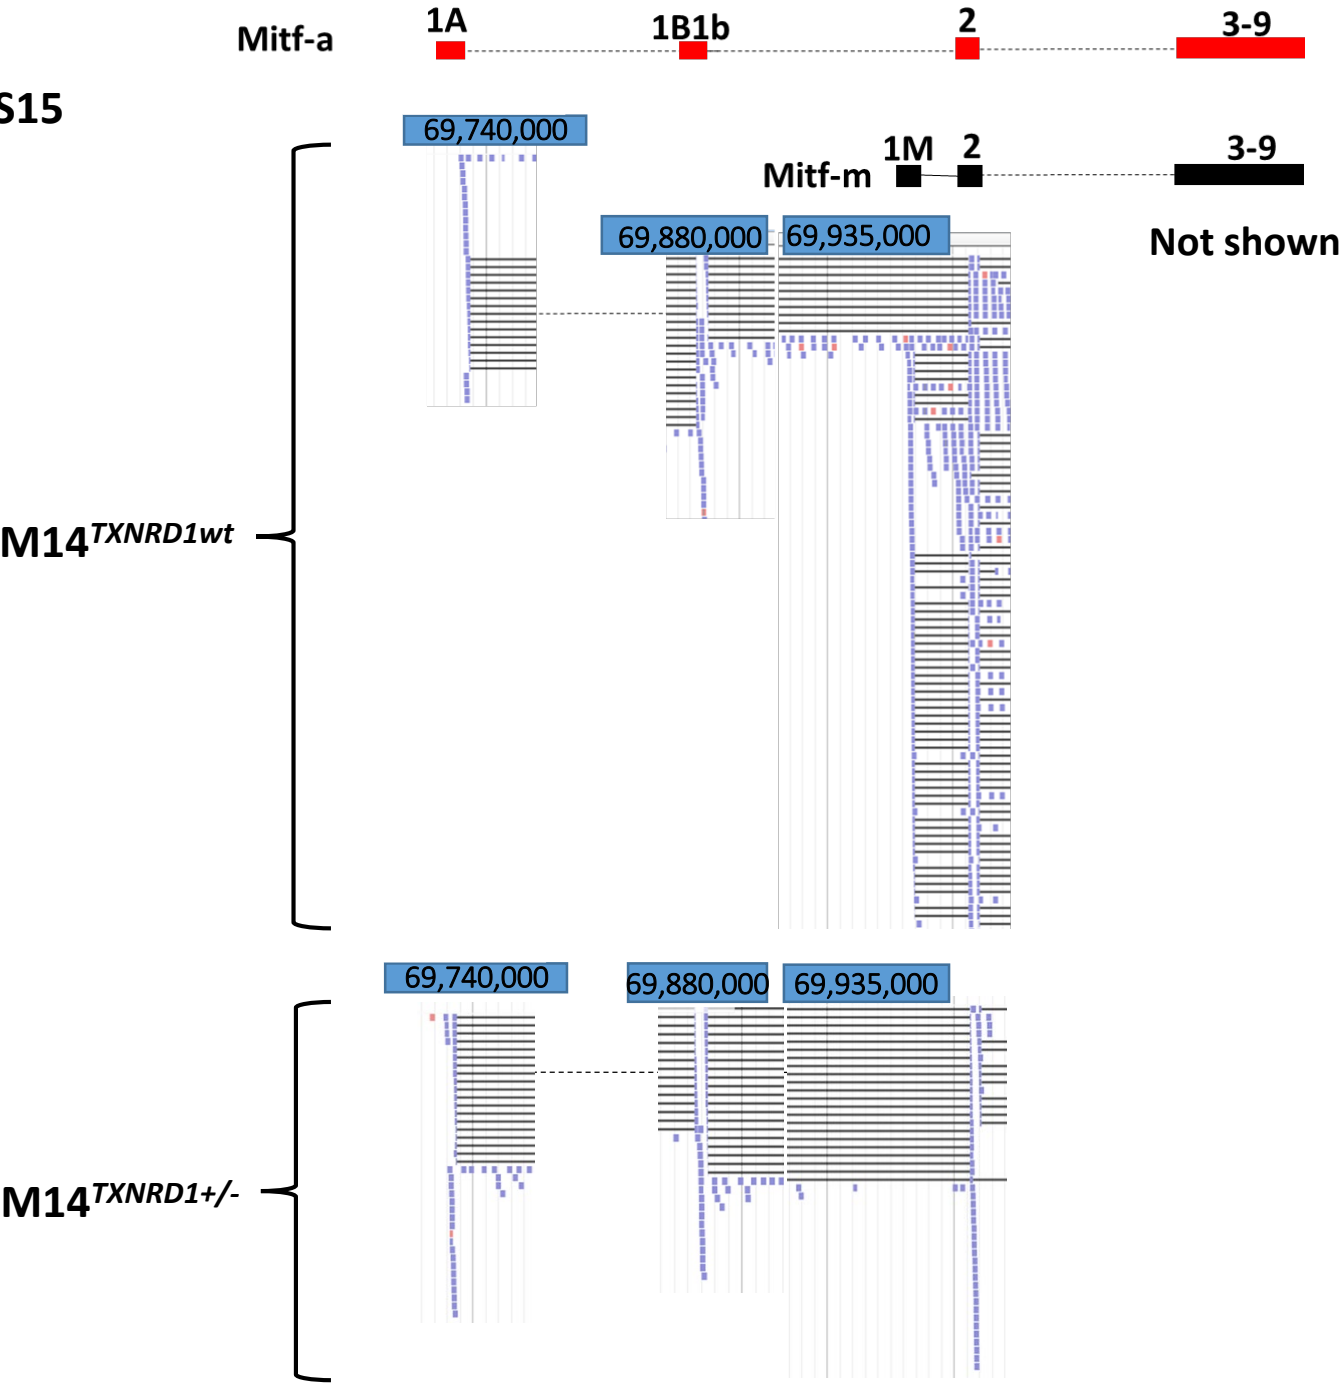



Supplementary Figure S16

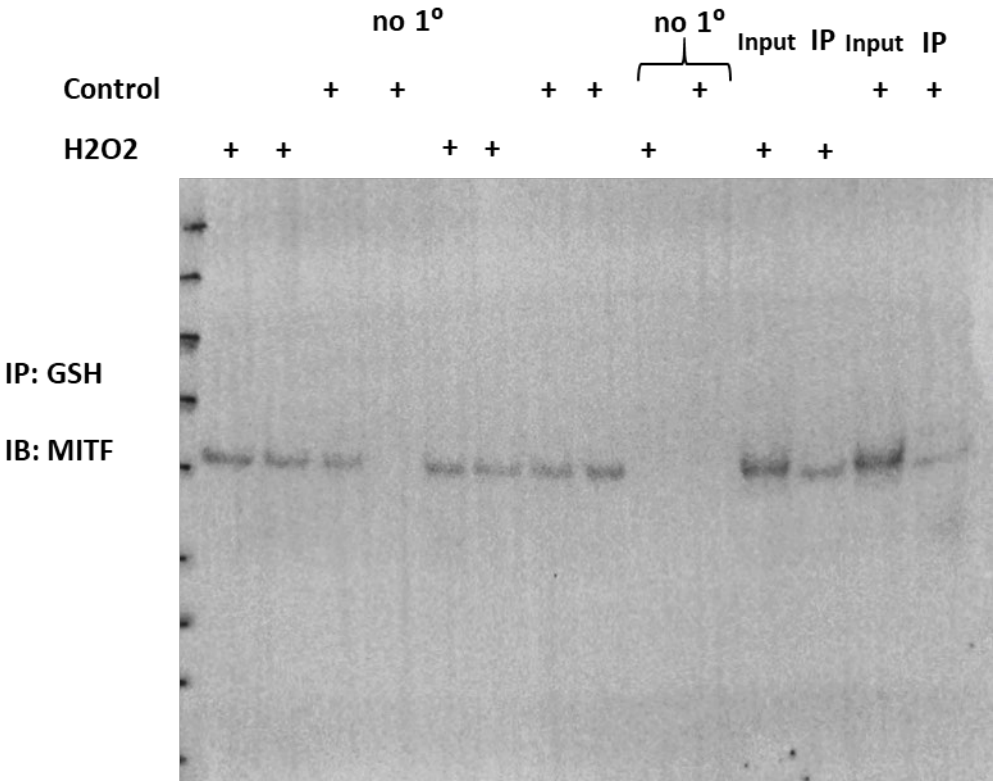

Supplementary Table S1. qPCR Primers

|         | Forward Primer 5'                 | Reverse Primer 5'               |
|---------|-----------------------------------|---------------------------------|
| GCLM    | tgg gca cag gta aaa cca a         | cag tca aat ctg gtg gca tc      |
| SLC7A11 | cag aag ctg cag tta gcc aag       | atg aag tct cgc gct ctt gt      |
| SLC1A4  | ttt gcg aca gca ttt gct ac        | tgt tct ctt caa tgc act tca tc  |
| GSR     | ttc aat gat cag cac caa cat gc    | taa cct cct tga cct ggg aga     |
| TXN     | gta gat gtg gat gac tgt cag ga    | cac cca cct ttt gtc cct tc      |
| TXNRD1  | ttg gaa tcc acc ctg tct gt        | cat cca cac tgg ggc tta ac      |
| GCLC    | atg cca tgg gat ttg gaa t         | aga tat act gca ggc ttg gaa tg  |
| RPLP0   | cct cgt gga agt gac atc gt        | atc tgc ttg gag ccc aca tt      |
| MITF*   | cat tgt tat gct gga aat gct aga a | ggc ttg ctg tat gtg gta ctt gg  |
| TRPM1*  | tgt ggg agt tgt tga gca cag aga   | atg cct tga aag acc act cct cca |
| DCT*    | gag tac acc ccg act acg tga       | ggc gtc ctg gtc cta ata atg     |
| Tyr*    | tag cgg atg cct ctc aaa gc        | agg agt ggc tgc ttt tct tca     |
| PMEL*   | tct ggg ctg agc att ggg           | aga cag tca ctt cca tgg tgt gtg |
